# Supplementary material for: Metabolic Reprogramming in Colon Cancer Cells Persistently Infected with Newcastle Disease Virus
Source: MDPI journal article supplement (doi:10.3390/cancers15030811), 2023-01-28
Supplement: s1 [file s1]

# **Metabolic reprogramming in persistent colon cancer cells infected by Newcastle disease virus**

Tong Yu<sup>1,#</sup>, Archana Chandrabhan Jadhav<sup>2,3,#</sup>, Jiabao Xu<sup>1,\*</sup>, Adrian L. Harris<sup>4</sup>, Venugopal Nair<sup>3</sup>, Wei E. Huang<sup>1,\*</sup>

<sup>1</sup>Department of Engineering Science, University of Oxford. Parks Road, Oxford OX1 3PJ, UK.

<sup>2</sup>Beamline B24, Diamond Light Source, Harwell Science and Innovation Campus, Didcot, Oxfordshire, OX11 0DE, UK

<sup>3</sup>Viral Oncogenesis Group, The Pirbright Institute, Pirbright, Woking, Surrey, GU24 0NF, UK & Department of Biology, University of Oxford, 11a Mansfield Road, Oxford OX1 3SZ, UK

<sup>4</sup>Molecular Oncology Laboratories, Department of Oncology, Weatherall Institute of Molecular Medicine, John Radcliffe Hospital, Oxford University, Oxford OX3 9DS, UK

#The authors contributed equally to this work.

\*Correspondence: Jiabao Xu, [jiabao.xu@eng.ox.ac.uk](mailto:jiabao.xu@eng.ox.ac.uk); Wei E Huang, [wei.huang@eng.ox.ac.uk](mailto:wei.huang@eng.ox.ac.uk)

**This PDF file includes:** Figure S1

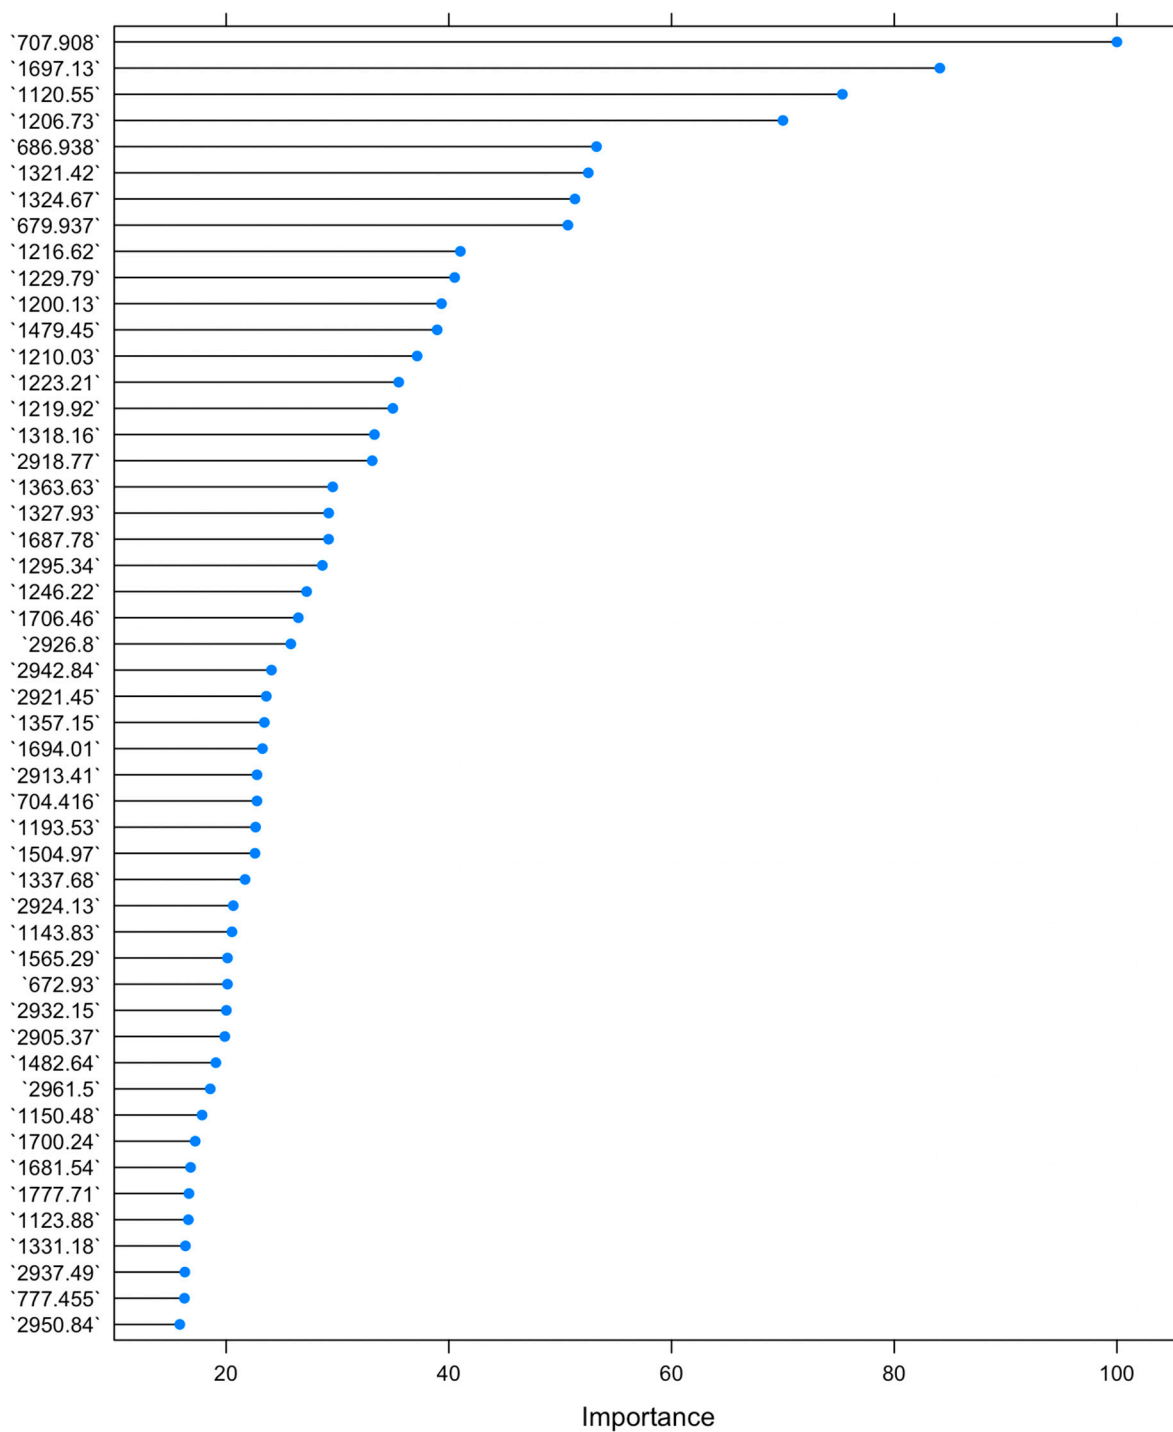

**Figure S1.** Variable importance of Raman wavenumber contributing to the LDA classification.
